# Supplementary material for: Elucidating Pharmacological Mechanisms of Natural Medicines by Biclustering Analysis of the Gene Expression Profile: A Case Study on Curcumin and Si-Wu-Tang
Source: MDPI journal article supplement (doi:10.3390/ijms16010510), 2014-12-29
Supplement: s1 [file s1]

# Supplementary Information

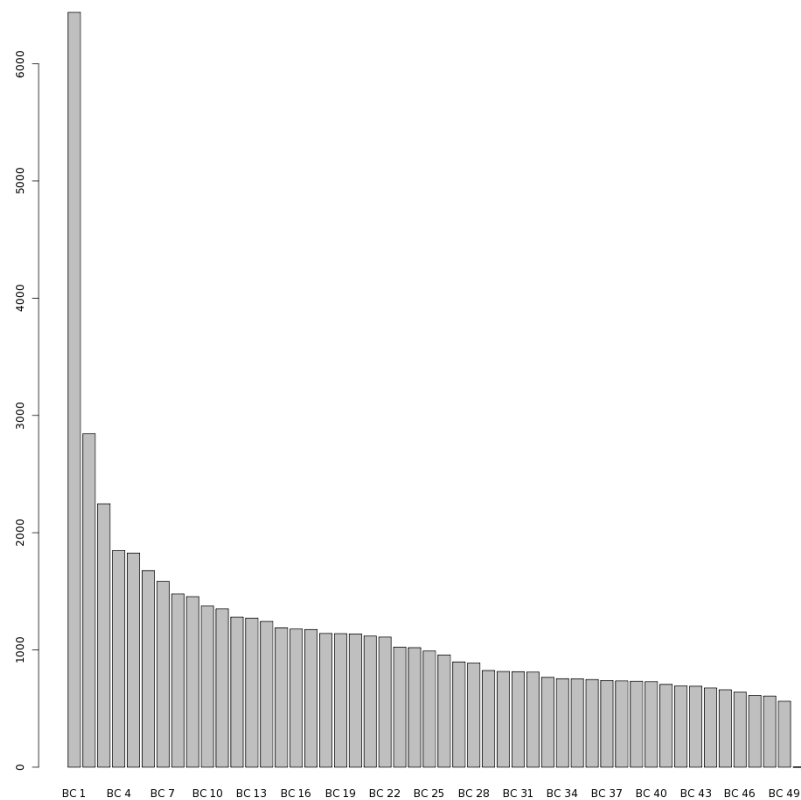

(a)

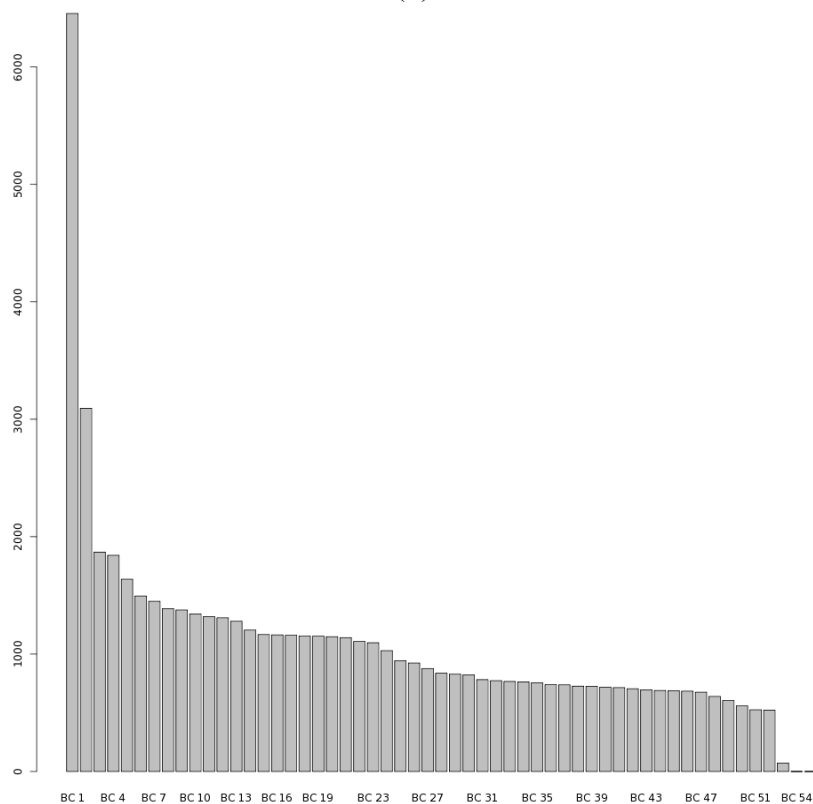

(b)

**Figure S1.** The bicluster information contents of cMap-curcumin (a) and cMap-Si-Wu-Tang (b) datasets.
