# Supplementary material
Source: MDPI journal article supplement (https://www.mdpi.com/1422-0067/16/1/510)
Supplement: s1 [file s1]

Archive with 2 entries (2 files):
- ijms-67814-Spplementary Information-Figure.pdf
- ijms-67814-Spplementary Information-Tables.xlsx
